# Supplementary material for: Cichorium pumilum Jacq Extract Inhibits LPS-Induced Inflammation via MAPK Signaling Pathway and Protects Rats From Hepatic Fibrosis Caused by Abnormalities in the Gut-Liver Axis
Source: Front Pharmacol. 2021 Apr 29;12:683613. doi: 10.3389/fphar.2021.683613 (PMC8117150; doi:10.3389/fphar.2021.683613)
Supplement: Supplementary file 7 [file Table4.XLSX]

## Sheet: Sheet1
Repeat 3 multiple wells for each experiment, and repeat the experiment 3 times
Bifidobacterium adolescentis
		OD1	OD2	OD3	F:AVERAGE(OD1+OD2+OD3)	G:OD value of culture medium without Bifidobacterium adolescentis	F-G
CGEA	50mg/ml	0.239541	0.233983	0.22524	0.232921	0.227	0.00592133
	25mg/ml	0.23698	0.259673	0.251341	0.249331	0.248852	0.000479333
	12.5mg/ml	0.334873	0.339437	0.339416	0.337909	0.242744	0.0951647
	6.25mg/ml	0.385897	0.392799	0.377787	0.385494	0.238456	0.147038
	3.125mg/ml	0.416163	0.413556	0.404176	0.411298	0.255634	0.155664
	1.56mg/ml	0.415074	0.409979	0.423289	0.416114	0.263907	0.152207
	0.78mg/ml	0.449791	0.453079	0.445223	0.449364	0.225851	0.223513
	0.39mg/ml	0.470587	0.472041	0.439825	0.460818	0.23165	0.229168
	0.195mg/ml	0.425404	0.45842	0.426023	0.436616	0.24512	0.191496
	0.0975mg/ml	0.379713	0.400969	0.396338	0.39234	0.240009	0.152331
	culture medium without Bifidobacterium adolescentis	0.268767	0.291232	0.275463	0.278487	0.276631	0.00185633
	0mg/ml	0.472468	0.456746	0.463544	0.464253	0.258855	0.205398
Bifidobacterium adolescentis
		OD1	OD2	OD3	AVERAGE(OD1+OD2+OD3)	OD value of culture medium without Bifidobacterium adolescentis	F-G
CGEA	50mg/ml	0.741504	0.750714	0.747949	0.746722	0.730976	0.0157463
	25mg/ml	0.911839	0.904702	0.915716	0.910752	0.782148	0.128604
	12.5mg/ml	1.00417	0.952679	0.964984	0.973944	0.788557	0.185387
	6.25mg/ml	0.974221	0.956591	0.919154	0.949989	0.767714	0.182275
	3.125mg/ml	0.957805	1.07841	0.951996	0.99607	0.777359	0.218711
	1.56mg/ml	1.04009	1.02437	1.06924	1.04457	0.800786	0.243781
	0.78mg/ml	0.981422	0.965997	1.01756	0.988326	0.740945	0.247381
	0.39mg/ml	0.989959	0.932962	0.958806	0.960576	0.768589	0.191987
	0.195mg/ml	0.965548	1.04071	0.979047	0.995102	0.801606	0.193496
	0.0975mg/ml	0.94867	0.908365	0.920715	0.925917	0.799465	0.126452
	culture medium without Bifidobacterium adolescentis	0.712871	0.702381	0.807822	0.741025	0.724475	0.0165497
	0mg/ml	0.991325	1.0052	0.972532	0.989686	0.806969	0.182717
Bifidobacterium adolescentis
		OD1	OD2	OD3	AVERAGE(OD1+OD2+OD3)	OD value of culture medium without Bifidobacterium adolescentis	F-G
CGEA	50mg/ml	0.543504	0.536704	0.52793	0.536046	0.479032	0.057014
	25mg/ml	0.728391	0.709301	0.712734	0.716809	0.663908	0.0529007
	12.5mg/ml	0.80732	0.796211	0.763281	0.788937	0.689823	0.0991143
	6.25mg/ml	0.773672	0.759372	0.71086	0.747968	0.662711	0.085257
	3.125mg/ml	0.756802	0.88741	0.785123	0.809778	0.695934	0.113844
	1.56mg/ml	0.80009	0.90242	0.91459	0.872367	0.705822	0.166545
	0.78mg/ml	0.780396	0.762015	0.81657	0.786327	0.541803	0.244524
	0.39mg/ml	0.790021	0.739838	0.759503	0.763121	0.569025	0.194096
	0.195mg/ml	0.868872	0.84517	0.870912	0.861651	0.686104	0.175547
	0.0975mg/ml	0.74982	0.744219	0.751723	0.748587	0.610021	0.138566
	culture medium without Bifidobacterium adolescentis	0.510379	0.501932	0.610372	0.540894	0.529821	0.0110733
	0mg/ml	0.789021	0.80127	0.795731	0.795341	0.600232	0.195109
Data processing
Group				AVERAGE	STDEVP
Normal	0.2054	0.1827	0.1951	0.1944	0.00928045
0.0975mg/ml	0.1523	0.1265	0.1386	0.139133	0.0105396
0.195mg/ml	0.1915	0.1935	0.1755	0.186833	0.00805536
0.39mg/ml	0.2292	0.192	0.1941	0.2051	0.0170628
0.78mg/ml	0.2235	0.2474	0.2445	0.238467	0.010649
1.56mg/ml	0.1522	0.2438	0.1665	0.1875	0.0402359
3.125mg/ml	0.1557	0.2187	0.1138	0.162733	0.0431131
6.25mg/ml	0.147	0.1823	0.0853	0.1382	0.040086
12.50mg/ml	0.0952	0.1854	0.0991	0.126567	0.0416319
25.00mg/ml	0.0005	0.1286	0.0529	0.0606667	0.0525842
50.00mg/ml	0.0059	0.0157	0.057	0.0262	0.0221433
